# Supplementary material
Source: Springer Nature journal article supplement (https://www.springermedizin.de/resource/supplementary/13014_2010_368_MOESM4_ESM.pdf/9633632)

**Control**

**IR**

**Perifosine**

**Combined**

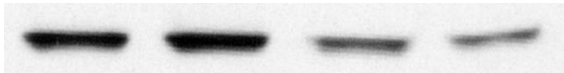

**p-Akt-T308**

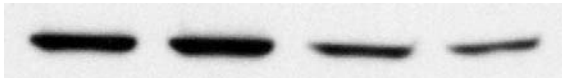

**p-Akt-S473**

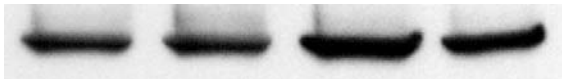

**Total Akt**

Supplement: MOESM4 [file 9633632]
